**Full title: The nuclear RNAi factor, NRDE2, prevents the accumulation of DNA damage  
during mitosis in stressful growth conditions**

**Short Title: Heterochromatin associated proteins and DNA damage in mitosis**

Aarati Asundi<sup>1, 2</sup>, Srivats Venkataramanan<sup>1</sup>, Atsushi Suzuki<sup>3</sup>, Stephen N. Floor<sup>1</sup>, Andrei  
Goga<sup>1, 4, 5</sup>, Noelle L'Etoile<sup>1</sup>

1. Department of Cell and Tissue Biology, University of California, San Francisco, CA, USA
2. Biomedical Sciences Graduate Program, University of California, San Francisco, CA, USA.
3. Department of Oncology, Astellas, 2-5-1, Nihonbashi-Honcho, Chuo-ku, Tokyo 103-8411, Japan
4. Department of Medicine, University of California, San Francisco, CA, USA.
5. Helen Diller Family Comprehensive Cancer Center, University of California, San Francisco, CA, USA.

## 1 **Abbreviations**

2 PGC: Proliferative Germ Cell

3 NRDE-2: Nuclear RNAi Defective-2

4 AuBK: Aurora B Kinase

5 Mrt: Mortal germ line

6

## 7 **Abstract**

8 Organisms have evolved multiple mechanisms to prevent and repair DNA damage to  
9 protect the integrity of the genome, particularly under stressful conditions. Unrepaired  
10 DNA damage leads to genomic instability, aneuploidy, and an increased risk for cancer.  
11 Before the cell can divide, it must repair damaged DNA and it is thought that this  
12 process requires global silencing of most transcription. In *C. elegans*, NRDE-2, in complex  
13 with other nuclear factors and guided by small RNA, directs heterochromatin formation  
14 and transcriptional silencing of targeted genes. Additionally, when *C. elegans* are  
15 cultivated at high temperatures, NRDE-2 is required to maintain germ line immortality.  
16 However, the role of NRDE-2 in maintaining the physical integrity of the genome is not  
17 understood. We show here that loss of NRDE2 in either nematode or human cells  
18 induces the accumulation of DNA damage specifically under conditions of stress, such as  
19 cultivation at a high temperature in *C. elegans* or Aurora B Kinase oncogenic  
20 overexpression in the MCF10A epithelial breast cell line. In addition, we found that  
21 NRDE2 interacts with  $\beta$ -actin in unstressed mammalian cells. This interaction is  
22 dramatically reduced upon DNA damage. The oligomerization state of nuclear actin

23 alters its association with targets, which in turn, regulates their function. Monomeric  
24 nuclear actin binds to heterochromatin remodeling factors and transcriptional activators  
25 while filamentous actin has been implicated in DNA repair processes. Here we show that  
26 NRDE2 associates with actin only when DNA is intact and the bulk of nuclear actin is  
27 monomeric. Thus, NRDE2 may dissociate from actin when it becomes filamentous as a  
28 result of DNA damage. This implies that, NRDE2, in its role as a heterochromatin factor,  
29 binds to monomeric actin, protecting the genome from DNA damage in stressful  
30 conditions. In this way, heterochromatin factors may associate with the actin dependent  
31 DNA repair process to allow appropriate mitotic progression and maintain genomic  
32 integrity.

33

#### 34 **Introduction**

35 Organisms have developed multiple ways to protect genomic integrity during mitotic  
36 cell division. Maintenance of the physical and informational integrity of the genome  
37 ensures that cells accurately transmit genetic information from one generation to the  
38 next, thereby safeguarding against diseases associated with genomic instability, such as  
39 cancer. Genomic instability is caused primarily through DNA damage. DNA damage can  
40 be incurred in a number of ways, including naturally during DNA replication, meiotic  
41 recombination, improper chromosome segregation, and transposable elements. DNA  
42 damage can also be caused by external sources such as UV irradiation or drugs. If the  
43 cell attempts to divide before the DNA is repaired, the unrepaired DNA damage can

44 result in mitotic delay, aneuploidy, or apoptosis, which in turn can lead to disorders in  
45 the organism including cancer and infertility.

46 To protect against genomic instability, cells must fulfill a checkpoint at the Gap2 to  
47 Mitosis (G2/M) transition [46] at which the cell repairs any DNA damage sustained  
48 during the previous cell cycle phases. If the requirements of the G2/M checkpoint are  
49 not satisfied, the cell will express a number of cell cycle inhibitors, leading to an arrest in  
50 G2. [30]

51 DNA repair is especially important in the germ line where strong evolutionary pressure  
52 to maintain the integrity of the genome of germ cells selects against harmful mutations.  
53 Thus, the germ line provides a window into how the environment affects the cell cycle.

54 The nematode *Caenorhabditis elegans* has a well-characterized germ line and  
55 reproductive cycle, which can be used to study the effects of improper mitosis on cell  
56 fate and fertility. The adult *C. elegans* gonad contains a stem cell niche, which  
57 mitotically proliferates to self-renew. These proliferating germ cells (PGCs) constitute  
58 the only pool of mitotically dividing cells in the adult worm. As the PGCs divide, they  
59 travel proximally along the gonad, where they transition from mitotic proliferation to  
60 meiotic division and ultimately differentiate into spermatozoa or oocytes. Therefore,  
61 maintaining mitotic integrity in the PGC pool is essential for ensuring the reproductive  
62 integrity of the animal.

63 Previous studies show that the number of PGCs is susceptible to internal molecular  
64 changes as well as external stresses, which can impact the worm's fertility. In addition to  
65 canonical signaling, such as the GLP-1/Notch, [31-32] DAF-7/TGF $\beta$  [33] and IGF-1/insulin

66 [34] pathways, many small RNA pathway proteins have also been extensively studied in  
67 the context of maintaining the PGC pool and fertility. For example, mutations in CSR-1  
68 (argonaute that binds endogenous 22G siRNAs)[36], EGO-1 (putative RdRP required for  
69 small RNA biosynthesis) [37, 38], DCR-1 (cleaves dsRNA) [39, 40] and EKL-1 (Tudor  
70 domain protein required in 22G RNA biosynthesis) [36, 41] have all been shown to have  
71 significant mitotic and meiotic germ cell defects. Furthermore, external stresses such as  
72 starvation or changes in cultivation temperature can directly impact the PGC pool and  
73 subsequently affect fertility. [34, 35]

74 In particular, the nuclear RNAi protein, NRDE-2 is required to maintain reproductive  
75 integrity of *C. elegans* in response to environmental stress. *Nrde-2* null mutants remain  
76 fertile indefinitely at when grown under normal conditions at 20°C, however, when  
77 propagated at 25°C they produce fewer progeny each successive generation until  
78 becoming completely sterile by the fourth generation. [1, 16] This progressive sterility is  
79 termed a mortal germ line phenotype (Mrt). *Nrde-2* null mutant worms grown at 25°C  
80 also express high levels of repetitive RNA as compared to wild type worms propagated  
81 under the same conditions. This is consistent with the hypothesis that NRDE-2 acts to  
82 silence transposons and repress repetitive sequences, [16, 47] which are naturally  
83 occurring DNA damaging agents and can affect the informational and physical integrity  
84 of the genome.

85 We and others have hypothesized that the Mrt phenotype seen in *C. elegans* mutants  
86 lacking heterochromatin factors, piRNA, or nuclear RNAi factors, including NRDE-2,  
87 might result from accumulated DNA damage in the germ line. [47] The function of

88 NRDE-2 in preventing DNA damage accumulation seems to be conserved across species  
89 but had not been directly studied in the *C. elegans* germ line. In the fission yeast, *S.*  
90 *pombe*, loss of the NRDE-2 homolog (known as *nrl1*) results in increased DNA damage,  
91 which was posited to arise from unresolved R-loops. [17] R-loops are RNA-DNA hybrids  
92 that arise from transcription of repetitive elements in which the RNA message invades  
93 the double stranded DNA helix. The DNA-RNA hybrid is more stable than the DNA-DNA  
94 hybrid and can cause DNA damage when the replication fork collides with it.  
95 Transcriptional silencing of repetitive elements by heterochromatin factors such as  
96 NRDE2 was thought to prevent the possibility of R-loop formation. [48] A recent study in  
97 HEK293 (human embryonic kidney) cells, however, showed the human homolog of  
98 NRDE-2 (known as NRDE2 or C14orf102) plays a role in DNA damage response and  
99 preventing the accumulation of double stranded breaks, independently of R-loop  
100 formation and resolution. [22] Thus, NRDE2 may act in its capacity as a heterochromatin  
101 factor to repress transcription of repetitive elements to limit both R-loop formation and  
102 transposition, which are two events that pose threats to the integrity of the genome.  
103 Recently, it has been increasingly appreciated that heterochromatic regions of the  
104 genome (nuclear speckles) are associated with monomeric actin and that  
105 heterochromatin remodelers such as SWI/SNF, SWR1 and INO80 are tightly bound to  
106 actin monomers and this association is important for their ability to bind to chromatin.  
107 [45] Thus, stressors such as high temperature and DNA damage have been shown to tilt  
108 the balance of nuclear actin from monomeric to filamentous, which has been shown to

109 be required for efficient DNA damage repair. [25] How heterochromatin associated  
110 factors and nuclear actin polymerization status are linked, however, remains unclear.  
111 In this paper, we show evidence that NRDE2 prevents the accumulation of DNA damage  
112 particularly under conditions of stress in proliferating cell populations. In the *C. elegans*  
113 germ line, NRDE-2 loss resulted in the accumulation of DNA damage only when the  
114 worms were propagated at a high temperature. This correlated with a decrease in the  
115 number of PGCs and was consistent with the previously reported Mrt phenotype.  
116 Moreover, in human cells, we found that NRDE2 loss did not significantly impact the  
117 proliferation of normal epithelial breast cells MCF10A unless they overexpress the  
118 oncogene Aurora B Kinase (AurKB). In these cells, we observed a delay in mitotic  
119 prophase as well as an increase in DNA damage. This indicates that NRDE2 may have a  
120 role in repair of DNA damage. Finally, we observed a strong protein-protein interaction  
121 between NRDE2 and  $\beta$ -actin in normally proliferating MCF10A cells, which was  
122 weakened upon the introduction of DNA damaging agents. Thus, we suggest a novel link  
123 between this heterochromatin factor, actin, and DNA repair.

124

## 125 **Results**

126 Loss of NRDE-2 coupled with propagation at high temperature incurs DNA damage in  
127 the mitotic zone of the *C. elegans* gonad  
128 Previous studies in *C. elegans* have shown that loss of NRDE-2 does not affect germ line  
129 immortality when the worms are propagated at 20°C. We have observed that although  
130 *nrde-2 (gg91)*, null mutants remain fertile indefinitely when cultivated at 20°C, these

131 worms have a lower brood size as compared to wild type (Fig S1,  $p=0.0148$ ,  $n=4$ ). In  
132 contrast, if the worms are cultivated at 25°C, a more stressful temperature, *nrde-2*  
133 (*gg91*) mutants exhibit a Mrt phenotype that increases in severity with each successive  
134 generation.[1] We asked whether the decrease in brood size of *nrde-2 (gg91)* mutant  
135 worms was a result of physiological defects in the gonad. We observed a significant  
136 decrease in the number of proliferating germ cells (PGCs) in the mitotic zone in *nrde-2*  
137 (*gg91*) worms propagated at 20°C as compared to wild type (Fig 1A and B, left,  
138  $p=0.0115$ ). When we propagated the worms at the stressful temperature of 25°C for 2  
139 generations (G2), we found that the number of PGCs was significantly decreased as  
140 compared to wild type G2 worms grown at 25°C (Fig 1A and B, left,  $p<0.0001$ ).  
141 Since the Mrt phenotype in *nrde-2 (gg91)* mutants depends on cultivation at 25°C, we  
142 asked whether the cells accumulated DNA damage at this temperature, which would  
143 ultimately cause sterility. We used immunofluorescence to stain for RAD-51, a marker of  
144 DNA damage repair, and found that *nrde-2 (gg91)* G2 worms grown at 25°C had  
145 significantly increased RAD-51 foci in the mitotic zone as compared to wild type G2  
146 worms grown at the same temperature (Fig 1A and B, right,  $p<0.0001$ ). We then asked  
147 whether the aberrant accumulation of DNA damage in the mitotic PGCs resulted in  
148 defects as the cells entered meiosis in the proximal gonad and progressed towards  
149 oocyte formation. We expressed the apoptotic cell corpse marker, CED-1::GFP, which  
150 labels apoptotic cell corpses in the proximal loop of the gonad, in *nrde-2 (gg91)* mutants  
151 and wild type worms. We found that when the worms were propagated at 20°C, *nrde-2*  
152 (*gg91*) mutants showed a similar number of CED-1::GFP labeled germ cell corpses as



153 wild type worms. However, *nrde-2 (gg91)* G1 and G2 worms showed increased numbers  
154 of CED-1::GFP labeled germ cell corpses as compared to wild type G1 and G2 worms,  
155 respectively (Figure 1C and D,  $p < 0.0001$  for both).

156 We conclude that when worms are cultivated at a normal, non-stressful temperature,  
157 loss of NRDE-2 has minor enduring impacts on fertility and integrity of the *C. elegans*  
158 germ line. However, when NRDE-2 loss is coupled with an external stress, such as a high  
159 cultivation temperature, the DNA damage and subsequent cell death in the gonad  
160 compounds over the generations, ultimately resulting in sterility. Therefore, we  
161 propose the NRDE-2 may have a role in preventing DNA damage accumulation in the  
162 mitotic PGCs in order to maintain integrity of the *C. elegans* germ line.

163 Loss of NRDE2 coupled with Aurora B Kinase overexpression in MCF10A cells results in  
164 DNA damage accumulation

165 To gain a biochemical and cell biological understanding of the role of NRDE-2, we  
166 decided to utilize the actively dividing MCF10A cell line. MCF10A cells are a normal  
167 human epithelial cell line derived from reduction mammoplasty. [4]

168 We used a lentiviral vector to stably express an eGFP-tagged version of human NRDE2 in  
169 the MCF10A cells. The eGFP::NRDE2 localized to puncta within the nucleus (Fig 2Ai).

170 These puncta were reminiscent of staining of heterochromatin and heterochromatin  
171 associated factors. [49] Once the cell entered prophase, as characterized by chromatin  
172 condensation, the eGFP signal became diffuse and remained so throughout mitosis (Fig  
173 2Aii-v) until cytokinesis, when eGFP::NRDE2 seemed to re-localize to puncta in the  
174 nuclei of the daughter cells (Fig 2Avi). The dynamics of this pattern of staining is similar

175 to that of human RNA pol II transcription machinery proteins TBP (TATA box-binding  
176 protein) and TAF12 (TATA box-binding protein associated factor 12) in HeLa cells. [29]  
177 These data are therefore consistent with a conserved role for NRDE2 as a transcriptional  
178 regulator in human cells.

179

180 To further test the hypothesis that NRDE-2 regulates DNA damage and mitosis under  
181 stressful conditions, we stably overexpressed an HA-tagged version of the oncogene  
182 Aurora B kinase (AuBK OE) in eGFP::NRDE-2 expressing MCF10A cells. AuBK regulates a  
183 number of mitotic events, including chromatin condensation, [5] microtubule-  
184 kinetochore attachment, [6], [7] and abscission. [8] Loss of this regulation has been  
185 linked to genetic instability, which results in aneuploidy, a key hallmark of cancer.  
186 Accordingly, AuBK over-expression has been linked to many cancer types and correlates  
187 with poor prognosis for patients. [11-12] The localization of eGFP::NRDE2 in AuBK OE  
188 MCF10A cell lines throughout the cell cycle was identical to that of eGFP::NRDE2 in  
189 control cells (Fig 2A vii and xii).

190

191 Consistent with AuBK's role in mediating chromatin condensation at the G2/M  
192 transition, AuBK OE MCF10A cells showed increased levels of phosphorylated Histone  
193 H3 (Fig 2B, middle,  $p=0.0337$ ,  $n=4$ ), a known target of Aurora B Kinase. We also  
194 observed a significant increase in  $\gamma$ H2AX (H2AX phosphorylation on S139), a common  
195 marker of DNA damage (Fig 2B, right,  $p=0.015$ ,  $n=5$ ). Therefore, we utilized AuBK  
196 overexpression as a tool to study the effects of NRDE2 loss on DNA damaged cells.

197

198 Next, we assessed the efficacy of using NRDE2 targeted siRNA as a tool to knockdown  
199 NRDE2 in MCF10A cells. We observed that cells treated with NRDE2 siRNA showed >90%  
200 decrease in eGFP::NRDE2 expression as compared to cells treated with a non-targeting  
201 siRNA control (Fig 2C). We then asked whether the amount of DNA damage in control or  
202 AuBK OE cells was altered upon NRDE2 knockdown. Interestingly, we found when  
203 control cells were treated with NRDE2 siRNA, there was no increase in  $\gamma$ H2AX as  
204 compared to control cells treated with non-targeting siRNA (Fig S3,  $p=0.11$ ,  $n=5$ ).  
205 However, loss of NRDE2 in AuBK OE cells resulted in increased DNA damage as  
206 compared to AuBK OE cells treated with non-targeting siRNA (Fig 2D,  $p=0.048$ ,  $n=5$ ). We  
207 conclude that loss of NRDE2 has a minimal effect on DNA damage in normally  
208 proliferating cells. However, in AuBK OE cells, which show an increased basal level of  
209 DNA damage, loss of NRDE2 further increases the accumulation of DNA damage.

210

211 Loss of NRDE2 coupled with Aurora B Kinase overexpression in MCF10A cells results in  
212 mitotic delay

213 We asked whether the increase in DNA damage observed in the AuBK OE cells upon  
214 NRDE2 loss would result in an observable change in mitotic cell proliferation. We  
215 observed that when AUBK OE cells were treated with NRDE2 siRNA, there was a  
216 decrease in overall metabolic cell activity in the culture (Fig S2) and a significant increase  
217 in the number of rounded cells (Fig 3A). Cells commonly round up due to a stall in  
218 mitosis or when the cell is about to undergo apoptosis, both of which could explain the

219 observed decrease in metabolic cell activity. To differentiate between these two  
220 possibilities, we used live cell imaging to record cell growth after NRDE2 knockdown. We  
221 found that AuBK OE cells treated with non-targeting siRNA took a longer time to  
222 complete mitosis than control cells. Furthermore, when AuBK OE cells were treated with  
223 NRDE2 siRNA, there was a significant increase in the average time through mitosis (Fig  
224 3B and C). However, we also noticed that a small proportion of AUBK-overexpressing  
225 cells required a significantly longer time to complete mitosis upon NRDE2 siRNA  
226 treatment (Fig 3B and C). The rounded morphology of the cells, the compaction of the  
227 chromatin and the concentration of the DNA at the cell center, indicated that this stall  
228 may occur during the early stages of mitosis.

229 We propose that the rounded cells observed upon NRDE2 knockdown in AUBK-  
230 overexpressing cells is due to a delay in mitosis. To further characterize this delay, we  
231 calculated the mitotic index of these cells. Consistent with the time lapse data, we found  
232 that AuBK OE cells had a higher mitotic index than control cells. However, we found no  
233 significant difference between the mitotic index of non-targeting siRNA treated cells and  
234 the NRDE2 siRNA treated cells in either the control or AuBK OE (Fig S3). We surmised  
235 that this could be due to the fact that the percentage of cells with a significant delay in  
236 mitosis is so low that these cells were not sufficient to affect the mitotic index.

237 We next asked whether we could identify the stage at which mitosis was delayed in  
238 AUBK-OE cells. We quantified the number of cells in each stage of mitosis in a fixed  
239 population of cells and found more cells in prophase upon NRDE2 knock down (Fig 3E p=  
240 0.025, n=4). This is also consistent with the time lapse analysis of AuBK OE cells delayed

241 in early mitosis (Fig 3C) leading us to conclude that the delay seen in NRDE2 knockdown  
242 AUBK-overexpressing cells may be occurring at prophase.  
243  
244 Mammalian NRDE2 interacts with  $\beta$ -actin in healthy, normally proliferating cells, and  
245 this interaction is weakened upon DNA damage  
246 Our finding that NRDE2 specifically mitigates DNA damage accumulation in sensitized or  
247 stressed cell populations led us to ask whether NRDE2 interacts with different partners  
248 under these conditions. We decided to probe this question using co-  
249 immunoprecipitation experiments, using an anti-GFP antibody to detect eGFP::NRDE2 in  
250 MCF10A lysates (Fig 4A and Fig S5).  
251 In *C. elegans*, NRDE-2 interacts with other nuclear RNAi factors NRDE-1 and NRDE-4, as  
252 well as the worm specific argonaute NRDE-3. [11] In contrast, NRDE2 does not interact  
253 with other RNAi factors in *S. pombe* yeast cells or in human cells. [22, 43, 44] Consistent  
254 with these findings, we saw no interaction between eGFP::NRDE2 and any of the known  
255 human Argonautes AGO-1/2/3/ or -4 (Fig S6).  
256 Interestingly, we observed a strong interaction between NRDE2 and  $\beta$ -actin in control  
257 cells (Fig 4A). Furthermore, this interaction seemed to be weakened in AuBK OE cells  
258 (Fig 4A and B,  $p=0.036$ ,  $n=5$ ). Although it is important to note that co-IP experiments do  
259 not necessary reflect a direct interaction between two proteins, these results may  
260 suggest an interesting function for NRDE2 in DNA damaged cells. Nuclear actin forms  
261 filaments upon DNA damage to aid in repair. [25] Since AuBK overexpression increases  
262 DNA damage in MCF10A cells, we hypothesized that the interaction between NRDE2

263 and  $\beta$ -actin may be weakened in these cells due to the nuclear actin forming filaments  
264 in response to DNA damage. To test whether DNA damage altered the interaction  
265 between NRDE2 and  $\beta$ -actin, we treated the cells with cisplatin, a DNA damaging  
266 reagent. In both control and AuBK overexpressing MCF10A cells, the interaction  
267 between NRDE2 and  $\beta$ -actin was reduced as compared to untreated cells (Fig 4A and B,  
268  $p=0.045$ ,  $n=3$ ). Therefore, we propose that NRDE2 interacts with  $\beta$ -actin only when the  
269 DNA is intact. However, when DNA damage is induced by stressors such as AuBK over-  
270 expression or the presence of cisplatin, the interaction between NRDE2 and  $\beta$ -actin is  
271 disrupted, perhaps as a result of the nuclear actin forming filaments to aid in DNA  
272 repair.

273

## 274 **Discussion**

275 This study describes a previously uncharacterized role for NRDE2, a putative nuclear  
276 RNA-binding protein, in protecting against DNA damage in stressed cells. Our study is  
277 the first to study the effect of NRDE2 loss in normal, unstressed cells as compared to in  
278 stressed cells. We have also shown that this protective role for NRDE2 in stressed cells is  
279 conserved in *C. elegans* and mammalian mitotic cells.

280 Previously, NRDE2 was described to protect against the accumulation of DNA damage,  
281 as assessed by an increase in  $\gamma$ H2AX levels upon NRDE2 loss in HEK293 cells. [22] We  
282 believe these results are consistent with these results as HEK293 cells are not a normally  
283 proliferating cell line. The HEK293 line was originally obtained by transforming human  
284 embryonic kidney cells with human adenovirus type 5, resulting in a 4.5kb insertion of a

285 viral fragment in chromosome 19 which interferes with cell death and cell cycle control  
286 pathways. [23] HEK293 cells are also hypotriploid, [24] which may further affect mitosis.  
287 Consistent with this point, we found that NRDE2 knockdown resulted in an increase of  
288  $\gamma$ H2AX levels only in AuBK-overexpressing MCF10A cells, not in the normal, unstressed  
289 control cells. Since AuBK overexpressing causes an increase in basal levels of DNA  
290 damage, we propose that NRDE2 in mammalian cells results in an accumulation of DNA  
291 damage only in cells with increases mitotic stress, similar to the results seen in *C.*  
292 *elegans*.  
293  
294 In *C. elegans*, loss of NRDE-2 alone does not seem to severely compromise the mitotic  
295 PGCs or brood size, as evidenced by the worms remaining indefinitely fertile and  
296 exhibiting relatively normal development. Upon the addition of a stressful 25°C  
297 cultivation temperature, however, there is a drastic reduction in the number of PGCs  
298 and brood size. Under these stressful conditions, DNA damage accumulates in the germ  
299 cells, presumably resulting in the previously observed Mrt phenotype. This trans-  
300 generational Mrt phenotype is similar to fertility defects seen in the RNAi spreading  
301 defective mutants *rsd-2* and *rsd-6*. RSD-2 and RSD-6, along with NRDE-2 were proposed  
302 to induce genome wide epigenetic silencing to maintain germ cell immortality and  
303 fertility. RSD-2 and RSD-6 are also thought to act in a different pathway than the 22G-  
304 RNA associating argonautes CSR-1 and ALG3/4, which display Mrt phenotypes due to  
305 defects in spermatogenesis. [16] The effect of NRDE-2 loss on spermatogenesis remains  
306 unclear.

307

308 The defects seen in *nrde-2 (gg91)* mutants may also be due to improper chromatin  
309 condensation and chromosome segregation. It has been previously reported that CSR-1  
310 is required for the localization of CDE-1, a nucleotidyltransferase protein that is  
311 responsible for the uridylation of siRNAs bound by CSR-1, to mitotic chromosomes in  
312 embryos. [19] Loss of CDE-1 results in an accumulation of siRNAs and improper gene  
313 silencing, as well as mitotic and meiotic chromosome segregation defects. NRDE-2, by  
314 contrast, associates with other NRDE pathway proteins to recruit methyltransferases  
315 MES-2 and SET-25, which direct the deposition of methylation marks to silence loci  
316 targeted by siRNAs. [20-21] Therefore, NRDE-2 loss may also result in improper gene  
317 silencing in the *C. elegans* germ line, resulting in mitotic defects, which are exacerbated  
318 by the stress of high temperature.

319

320 Interestingly, we observed a strong association between NRDE2 and  $\beta$ -actin in MCF10A  
321 cells that was diminished upon DNA damage causing agents. Since NRDE2 localizes to  
322 puncta in the interphase nucleus, we hypothesize that NRDE2 likely interacts with  
323 nuclear actin. One potential model for this interaction is that NRDE2 binds to  
324 monomeric nuclear actin in the unstressed cell. Monomeric nuclear actin associates  
325 with chromatin remodeling complexes, and might be involved in chromatin binding. [45]  
326 However, upon DNA damage, nuclear actin assembles into filaments and promotes DNA  
327 damage repair. [25] NRDE2 may be displaced or unable to bind to filamentous actin, and  
328 as a result, show a weakened interaction on  $\beta$ -actin upon DNA damage. It is still unclear



329 whether NRDE-2 functions in preventing the formation of DNA damage or as a  
330 chromatin associated sensor of DNA damage in the  $\beta$ -actin dependent DNA repair  
331 pathway. Further study is needed to characterize the function of NRDE2, and possibly  
332 other heterochromatin factors, in preventing DNA damage accumulation and  
333 maintaining genomic stability. The interaction between NRDE2 and  $\beta$ -actin is especially  
334 exciting as it may indicate a new mechanistic role for NRDE2 in the nucleus beyond gene  
335 silencing and epigenetic inheritance.

336

## 337 **Materials and Methods**

### 338 *C. elegans* strains

339 All strains were cultured on Nematode Growth Medium (NGM) plates seeded with *E.*  
340 *coli* OP50. Bristol N2 was the wild type strain used. Loss of NRDE-2 was studied using the  
341 mutant allele *nrde-2 (gg91)*. Worms were crossed into a strain expressing *ced-1p::GFP+*  
342 *lin-15 (+)* to study apoptotic cells.

343

### 344 Gonad Staining

345 Gonads were dissected from young adults (24 hours post-L4 stage) in 1xEGG buffer  
346 (25mM HEPES, pH7.3; 118mM NaCl, 48mM KCl, 2mM CaCl<sub>2</sub>, 2mM MgCl<sub>2</sub>) and fixed in  
347 2% (final concentration) formaldehyde. The following primary antibodies were used:  
348 rabbit anti-RAD-51 and chicken anti-HTP-3. Fixed gonads were imaged with exposure  
349 times of 100ms with DAPI, GFP, TRITC, and CY5 filter cubes and a mercury arc lamp on a  
350 Zeiss AxioPlan2 epifluorescence microscope (operated by MicroManager 1.4.13) with a

351 60x 1.3 DIC oil objective and a QIClick camera (QImaging). Images were recorded with  
352 a Z-optical spacing of 2  $\mu$ m and analyzed using the Image J software.

353

#### 354 Progeny Assay

355 Sixteen L4-staged worms were individually placed on a 5cm NGM plate with op50. Every  
356 24 hours, the worm was moved to a fresh plate for 10 consecutive days. 48 hours after  
357 the original worm was removed from the plate, the number of living progeny was  
358 counted.

359

#### 360 Cell Culture

361 MCF10A cells lines expressed a vector conferring puromycin/ blastocidin antibiotic  
362 resistance that was empty (control) or that drove the overexpression of Aurora B Kinase  
363 (AuBK OE). MCF10A cells were maintained in Dulbecco's modified Eagle's medium/F-12,  
364 phenol red free medium supplemented with 5% heat inactivated horse serum, 20 ng/ml  
365 recombinant EGF (Invitrogen), 0.5  $\mu$ g/ml hydrocortisone (Sigma), 100 ng/ml cholera  
366 toxin (Sigma), and 10  $\mu$ g/ml insulin (Sigma). U2OS cells were maintained using  
367 Dulbecco's modified Eagle's medium with phenol red supplemented with 10% FBS.

368

#### 369 siRNA knockdown

370 We used the following Thermo Scientific siRNAs: siGENOME Non-Targeting siRNA  
371 Pool#2 (D-001206-14-20), siGENOME Human NRDE2 (55051) siRNA- SMARTpool (M-  
372 013794-00-0005). siRNAs were added to the cell culture at a final concentration of 5nM

373 in OPTIMEM Reduced Serum Media with Lipofectamine 2000 Reagent (1ug/ml final  
374 concentration) (Invitrogen) for 24 hours. Cells were then washed 1x with PBS and fresh  
375 MCF10A media was added. 48 hours after changing media, the cells were harvested for  
376 analysis.

377

### 378 Western Blot

379 Cultured cells were homogenized in Laemmli Buffer (60 mM Tris-HCl pH 7.6, 2% SDS,  
380 1mM DTT) containing COMPLETE protease inhibitor cocktail (Roche #118361700001)  
381 and phosphatase inhibitors (Santa Cruz Biotechnology)). Protein concentrations were  
382 determined by performing DC Protein Assay (Bio-Rad) using BSA as standard. Protein  
383 extracts were resolved using Bolt 4%-12% Bis-Tris PAGE gels (Invitrogen) with 1x MES  
384 SDS Running Buffer (Life Technologies). Transfer to nitrocellulose membranes (Life  
385 Technologies) was performed on an iBlot apparatus (Invitrogen). Membranes were  
386 probed with primary antibodies overnight on a 4°C shaker and then incubated with  
387 horseradish peroxidase (HRP)-conjugated secondary antibodies, and signals were  
388 visualized with ECL (Bio-Rad) or Visualizer Western Blot Detection Kit, rabbit (Millipore).  
389 The following primary antibodies were used: GFP (Rockland, 600-101-215), phospho-  
390 Histone H3 (Ser10) (Cell Signaling Technologies, #9701), phospho-Histone H2A.X (Ser  
391 139) (Cell Signaling Technologies, #9718), HA-tag (Cell Signaling Technologies #2367),  
392 PARP (Cell Signaling Technologies, #9542),  $\beta$ -actin HRP (Santa Cruz Biotechnology, sc-  
393 47778)

394

395 Cell Immunofluorescence

396 Cells were grown on a sterilized glass coverslip (Fisherbrand). After siRNA treatment, the  
397 cells were fixed with ice cold 100% methanol for 3 minutes at -20°C and rehydrated with  
398 TBST (1xTBS, 0.1% Tween 20). Antibodies were made up in blocking solution (2gBSA  
399 powder, 0.1g NaN<sub>3</sub>, 100mL TBST). The following primary antibodies were used: human  
400 anti-centromere (CREST, 1:50, Antibodies Incorporated 15-234) mouse anti- $\alpha$ -tubulin  
401 (DM1a, 1:1000, Sigma T6199), rabbit anti- $\gamma$ -tubulin (1:1000, Sigma T3559). Cells were  
402 mounted with Vectashield Mounting Medium with DAPI (Vector Laboratories H-1200).

403

404 Time lapse Imaging

405 MCF10A cells expressing H2B::mCherry were imaged at 37°C with a 100x NA 1.49  
406 objective lens (CFI APO TIRF; Nikon) on an inverted microscope system (TE2000 Perfect  
407 Focus System; Nikon) equipped with a Borealis modified spinning disk confocal unit  
408 (CSU10; Yokogawa) with 200-mW, 405 nm, 488 nm, 561 nm and 643 nm solid-state  
409 lasers (LMM5; Spectral Applied Research), electronic shutters, a Clara cooled scientific-  
410 grade interline CCD camera (Andor), and controlled by NIS-Elements software (Nikon).

411

412 Co-Immunoprecipitation

413 Cells were collected and lysed in cold lysis buffer (150mM NaCl/ 1.0% IGEPAL/ 50mM  
414 Tris-Cl (pH 7.4)) containing Complete protease inhibitor cocktail (Roche, 118361700001)  
415 by nutating at 4°C for 30 minutes. The lysate was spun at 14K G, and supernatant was  
416 transferred to a new tube, and cleared using 50ul of Dynabeads Protein A (Invitrogen,

417 10001D). Pre-cleared lysate was removed from the beads using magnetic separation  
418 (input sample was collected at this stage), added to 5 ul of anti-GFP antibody (Rockland,  
419 600-101-215), and nutated at 4°C for 2 hours. Antibody-protein complexes were  
420 isolated by the addition of Dynabeads Protein A (Invitrogen, 10001D), overnight  
421 nutation and magnetic separation. The beads were washed with the lysis buffer  
422 containing protease inhibitors five times. IP western blot bands were normalized to 5%  
423 sample input.

424

#### 425 **Acknowledgements**

426 Thanks to Dr. Scott Kennedy for providing the nrde-2 (gg91) strain and to Dr. Needhi  
427 Bhalla (UC Santa Cruz) for providing the CED-1::GFP strain. We would like to thank Dr.  
428 Gina Caldas (Dernburg lab at UC Berkeley) for reagents and advice about *C. elegans*  
429 gonad immunofluorescence staining. We extend a special thanks to Christina Hueschen  
430 (Dumont lab at UCSF) for creating a nuclear GFP quantification MatLab script. We would  
431 also like to thank Dr. Sophie Dumont and Dr. Torsten Wittmann (UCSF) for use of their  
432 microscopes and advice regarding imaging and the cell cycle. Srivats Venkataramanan  
433 and Stephen N. Floor are supported by funds from the California Tobacco-Related  
434 Disease Research Grants Program Office of the University of California, 27KT-0003 and  
435 the Program for Breakthrough Biomedical Research, which is partially funded by the  
436 Sandler Foundation

437

438

439 **References**

- 440 [1] Buckley BA, Burkhart KB, Gu SG, Spracklin G, Kershner A, Fritz H, Kimble J, Fire A,  
441 Kennedy S. A nuclear Argonaute promotes multigenerational epigenetic inheritance and  
442 germline immortality. *Nature*. 2012 Sep 20;489(7416):447-51. doi:  
443 10.1038/nature11352.
- 444
- 445 [2] Burton NO, Burkhart KB, Kennedy S. Nuclear RNAi maintains heritable gene silencing  
446 in *Caenorhabditis elegans*. *Proc Natl Acad Sci U S A*. 2011 Dec 6;108(49):19683-8. doi:  
447 10.1073/pnas.1113310108.
- 448
- 449 [3] Zhou Z, Hartweg E, Horvitz HR. CED-1 is a transmembrane receptor that mediates  
450 cell corpse engulfment in *C. elegans*. *Cell*. 2001 Jan 12;104(1):43-56.
- 451
- 452 [4] Soule HD, Maloney TM, Wolman SR, Peterson WD Jr, Brenz R, McGrath CM, Russo J,  
453 Pauley RJ, Jones RF, Brooks SC. Isolation and characterization of a spontaneously  
454 immortalized human breast epithelial cell line, MCF-10. *Cancer Res*. 1990 Sep  
455 15;50(18):6075-86.
- 456
- 457 [5] Goto H, Yasui Y, Nigg EA, Inagaki M. Aurora-B phosphorylates Histone H3 at serine28  
458 with regard to the mitotic chromosome condensation. *Genes Cells*. 2002 Jan;7(1):11-7.
- 459

- 460 [6] Lampson MA, Grishchuk EL. Mechanisms to Avoid and Correct Erroneous  
461 Kinetochore-Microtubule Attachments. *Biology (Basel)*. 2017 Jan 5;6(1). pii: E1. doi:  
462 10.3390/biology6010001.  
463
- 464 [7] Welburn JP, Vleugel M, Liu D, Yates JR 3rd, Lampson MA, Fukagawa T, Cheeseman  
465 IM. Aurora B phosphorylates spatially distinct targets to differentially regulate the  
466 kinetochore-microtubule interface. *Mol Cell*. 2010 May 14;38(3):383-92. doi:  
467 10.1016/j.molcel.2010.02.034.  
468
- 469 [8] Steigemann P, Wurzenberger C, Schmitz MH, Held M, Guizetti J, Maar S, Gerlich DW.  
470 Aurora B-mediated abscission checkpoint protects against tetraploidization. *Cell*. 2009  
471 Feb 6;136(3):473-84. doi: 10.1016/j.cell.2008.12.020.  
472
- 473 [9] Fell VL, Walden EA, Hoffer SM, Rogers SR, Aitken AS, Salemi LM, Schild-Poulter C.  
474 Ku70 Serine 155 mediates Aurora B inhibition and activation of the DNA damage  
475 response. *Sci Rep*. 2016 Nov 16;6:37194. doi: 10.1038/srep37194.  
476
- 477 [10] Monaco L, Kolthur-Seetharam U, Loury R, Murcia JM, de Murcia G, Sassone-Corsi P.  
478 Inhibition of Aurora-B kinase activity by poly(ADP-ribosyl)ation in response to DNA  
479 damage. *Proc Natl Acad Sci U S A*. 2005 Oct 4;102(40):14244-8.  
480

- 481 [11] Guang S, Bochner AF, Burkhart KB, Burton N, Pavelec DM, Kennedy S. Small  
482 regulatory RNAs inhibit RNA polymerase II during the elongation phase of transcription.  
483 Nature. 2010 Jun 24;465(7301):1097-101. doi: 10.1038/nature09095.  
484
- 485 [12] Chieffi P. Aurora B: A new promising therapeutic target in cancer. Intractable Rare  
486 Dis Res. 2018 May;7(2):141-144. doi: 10.5582/irdr.2018.01018.  
487
- 488 [13] Tang A, Gao K, Chu L, Zhang R, Yang J, Zheng J. Aurora kinases: novel therapy  
489 targets in cancers. Oncotarget. 2017 Apr 4;8(14):23937-23954. doi:  
490 10.18632/oncotarget.14893.  
491
- 492 [14] Zuazua-Villar P, Rodriguez R, Gagou ME, Eysers PA, Meuth M. DNA replication stress  
493 in CHK1-depleted tumour cells triggers premature (S-phase) mitosis through  
494 inappropriate activation of Aurora kinase B. Cell Death Dis. 2014 May 22;5:e1253. doi:  
495 10.1038/cddis.2014.231.  
496
- 497 [15] Kabeche L, Nguyen HD, Buisson R, Zou L. A mitosis-specific and R loop-driven ATR  
498 pathway promotes faithful chromosome segregation. Science. 2018 Jan  
499 5;359(6371):108-114. doi: 10.1126/science.aan6490.  
500
- 501 [16] Sakaguchi A, Sarkies P, Simon M, Doebley AL, Goldstein LD, Hedges A, Ikegami K,  
502 Alvares SM, Yang L, LaRocque JR, Hall J, Miska EA, Ahmed S. *Caenorhabditis elegans*



503 RSD-2 and RSD-6 promote germ cell immortality by maintaining small interfering RNA  
504 populations. Proc Natl Acad Sci U S A. 2014 Oct 14;111(41):E4323-31. doi:  
505 10.1073/pnas.1406131111.  
506  
507 [17] Aronica L, Kasperek T, Ruchman D, Marquez Y, Cipak L, Cipakova I, Anrather D,  
508 Mikolaskova B, Radtke M, Sarkar S, Pai CC, Blaikley E, Walker C, Shen KF, Schroeder R,  
509 Barta A, Forsburg SL, Humphrey TC. The spliceosome-associated protein Nrl1 suppresses  
510 homologous recombination-dependent R-loop formation in fission yeast. Nucleic Acids  
511 Res. 2016 Feb 29;44(4):1703-17. doi: 10.1093/nar/gkv1473.  
512  
513 [18] Conine CC, Moresco JJ, Gu W, Shirayama M, Conte D Jr, Yates JR 3rd, Mello CC.  
514 Argonautes promote male fertility and provide a paternal memory of germline gene  
515 expression in *C. elegans*. Cell. 2013 Dec 19;155(7):1532-44. doi:  
516 10.1016/j.cell.2013.11.032.  
517  
518 [19] van Wolfswinkel JC, Claycomb JM, Batista PJ, Mello CC, Berezikov E, Ketting RF.  
519 CDE-1 affects chromosome segregation through uridylation of CSR-1-bound siRNAs. Cell.  
520 2009 Oct 2;139(1):135-48. doi: 10.1016/j.cell.2009.09.012.  
521  
522 [20] Mao H, Zhu C, Zong D, Weng C, Yang X, Huang H, Liu D, Feng X, Guang S. The Nrde  
523 Pathway Mediates Small-RNA-Directed Histone H3 Lysine 27 Trimethylation in

524 *Caenorhabditis elegans*. *Curr Biol*. 2015 Sep 21;25(18):2398-403. doi:

525 10.1016/j.cub.2015.07.051.

526

527 [21] Burkhart KB, Guang S, Buckley BA, Wong L, Bochner AF, Kennedy S. A pre-mRNA-  
528 associating factor links endogenous siRNAs to chromatin regulation. *PLoS Genet*. 2011  
529 Aug;7(8):e1002249. doi: 10.1371/journal.pgen.1002249.

530

531 [22] Richard P, Ogami K, Chen Y, Feng S, Moresco JJ, Yates JR 3rd, Manley JL. NRDE-2,  
532 the human homolog of fission yeast Nrl1, prevents DNA damage accumulation in human  
533 cells. *RNA Biol*. 2018 Aug 2:1-9. doi: 10.1080/15476286.2018.1467180.

534

535 [23] Lin YC, Boone M, Meuris L, Lemmens I, Van Roy N, Soete A, Reumers J, Moisse M,  
536 Plaisance S, Drmanac R, Chen J, Speleman F, Lambrechts D, Van de Peer Y, Tavernier J,  
537 Callewaert N. Genome dynamics of the human embryonic kidney 293 lineage in  
538 response to cell biology manipulations. *Nat Commun*. 2014 Sep 3;5:4767. doi:  
539 10.1038/ncomms5767.

540

541 [24] Bylund L, Kytölä S, Lui WO, Larsson C, Weber G. Analysis of the cytogenetic stability  
542 of the human embryonic kidney cell line 293 by cytogenetic and STR profiling  
543 approaches. *Cytogenet Genome Res*. 2004;106(1):28-32.

544

545 [25] Belin BJ, Lee T, Mullins RD. DNA damage induces nuclear actin filament assembly by  
546 Formin -2 and Spire-½ that promotes efficient DNA repair. [corrected]. Elife. 2015 Aug  
547 19;4:e07735. doi: 10.7554/eLife.07735. Erratum in: Elife. 2015;4. doi:  
548 10.7554/eLife.11935.

549

550 [26] Caridi CP, D'Agostino C, Ryu T, Zapotoczny G, Delabaere L, Li X, Khodaverdian VY,  
551 Amaral N, Lin E, Rau AR, Chiolo I. Nuclear F-actin and myosins drive relocalization of  
552 heterochromatic breaks. Nature. 2018 Jul;559(7712):54-60. doi: 10.1038/s41586-018-  
553 0242-8.

554

555 [27] Kim asutis KM, Kozminski KG. Cell cycle checkpoint regulators reach a zillion. Cell  
556 Cycle. 2013 May 15;12(10):1501-9. doi: 10.4161/cc.24637.

557

558 [28] Hamperl S, Cimprich KA. Conflict Resolution in the Genome: How Transcription and  
559 Replication Make It Work. Cell. 2016 Dec 1;167(6):1455-1467. doi:  
560 10.1016/j.cell.2016.09.053.

561

562 [29] Segil N, Guermah M, Hoffmann A, Roeder RG, Heintz N. Mitotic regulation of TFIIID:  
563 inhibition of activator-dependent transcription and changes in subcellular localization.  
564 Genes Dev. 1996 Oct 1;10(19):2389-400.

565

- 566 [30] Taylor WR, Stark GR. Regulation of the G2/M transition by p53. *Oncogene*. 2001  
567 Apr 5;20(15):1803-15.  
568
- 569 [31] Kimble J, Simpson P. The LIN-12/Notch signaling pathway and its regulation. *Annu*  
570 *Rev Cell Dev Biol*. 1997;13:333-61.  
571
- 572 [32] Fox PM, Schedl T. Analysis of Germline Stem Cell Differentiation Following Loss of  
573 GLP-1 Notch Activity in *Caenorhabditis elegans*. *Genetics*. 2015 Sep;201(1):167-84. doi:  
574 10.1534/genetics.115.178061.  
575
- 576 [33] Dalfó D, Michaelson D, Hubbard EJ. Sensory regulation of the *C. elegans* germline  
577 through TGF- $\beta$ -dependent signaling in the niche. *Curr Biol*. 2012 Apr 24;22(8):712-9. doi:  
578 10.1016/j.cub.2012.02.064.  
579
- 580 [34] Michaelson D, Korta DZ, Capua Y, Hubbard EJ. Insulin signaling promotes germline  
581 proliferation in *C. elegans*. *Development*. 2010 Feb;137(4):671-80. doi:  
582 10.1242/dev.042523. Erratum in: *Development*. 2014 Jan;141(1):237.  
583
- 584 [35] Begasse ML, Leaver M, Vazquez F, Grill SW, Hyman AA. Temperature Dependence  
585 of Cell Division Timing Accounts for a Shift in the Thermal Limits of *C. elegans* and  
586 *C. briggsae*. *Cell Rep*. 2015 Feb 4. pii: S2211-1247(15)00007-8. doi:  
587 10.1016/j.celrep.2015.01.006.

588

589 [36] Claycomb JM, Batista PJ, Pang KM, Gu W, Vasale JJ, van Wolfswinkel JC, Chaves DA,  
590 Shirayama M, Mitani S, Ketting RF, Conte D Jr, Mello CC. The Argonaute CSR-1 and its  
591 22G-RNA cofactors are required for holocentric chromosome segregation. *Cell*. 2009 Oct  
592 2;139(1):123-34. doi: 10.1016/j.cell.2009.09.014.

593

594 [37] Vought VE, Ohmachi M, Lee MH, Maine EM. EGO-1, a putative RNA-directed RNA  
595 polymerase, promotes germ line proliferation in parallel with GLP-1/notch signaling and  
596 regulates the spatial organization of nuclear pore complexes and germ line P granules in  
597 *Caenorhabditis elegans*. *Genetics*. 2005 Jul;170(3):1121-32.

598

599 [38] Maine EM, Hauth J, Ratliff T, Vought VE, She X, Kelly WG. EGO-1, a putative RNA-  
600 dependent RNA polymerase, is required for heterochromatin assembly on unpaired dna  
601 during *C. elegans* meiosis. *Curr Biol*. 2005 Nov 8;15(21):1972-8.

602

603 [39] Duchaine TF, Wohlschlegel JA, Kennedy S, Bei Y, Conte D Jr, Pang K, Brownell DR,  
604 Harding S, Mitani S, Ruvkun G, Yates JR 3rd, Mello CC. Functional proteomics reveals  
605 the biochemical niche of *C. elegans* DCR-1 in multiple small-RNA-mediated pathways.  
606 *Cell*. 2006 Jan 27;124(2):343-54.

607

- 608 [40] Sy Bukhari SI, Vasquez-Rifo A, Gagné D, Paquet ER, Zetka M, Robert C, Masson JY,  
609 Simard MJ. The microRNA pathway controls germ cell proliferation and differentiation in  
610 *C. elegans*. Cell Res. 2012 Jun;22(6):1034-45. doi: 10.1038/cr.2012.31.  
611
- 612 [41] Rocheleau CE, Cullison K, Huang K, Bernstein Y, Spilker AC, Sundaram MV. The  
613 *Caenorhabditis elegans* ekl (enhancer of ksr-1 lethality) genes include putative  
614 components of a germline small RNA pathway. Genetics. 2008 Mar;178(3):1431-43. doi:  
615 10.1534/genetics.107.084608.  
616
- 617 [42] Menck CF, Munford V. DNA repair diseases: What do they tell us about cancer and  
618 aging? Genet Mol Biol. 2014 Mar;37(1 Suppl):220-33.  
619
- 620 [43] Lubas M, Christensen MS, Kristiansen MS, Domanski M, Falkenby LG, Lykke-  
621 Andersen S, Andersen JS, Dziembowski A, Jensen TH. Interaction profiling identifies the  
622 human nuclear exosome targeting complex. Mol Cell. 2011 Aug 19;43(4):624-37. doi:  
623 10.1016/j.molcel.2011.06.028.  
624
- 625 [44] Ogami K, Richard P, Chen Y, Hoque M, Li W, Moresco JJ, Yates JR 3rd, Tian B,  
626 Manley JL. An Mtr4/ZFC3H1 complex facilitates turnover of unstable nuclear RNAs to  
627 prevent their cytoplasmic transport and global translational repression. Genes Dev.  
628 2017 Jun 15;31(12):1257-1271. doi: 10.1101/gad.302604.117.  
629

- 630 [45] Virtanen JA, Vartiainen MK. Diverse functions for different forms of nuclear actin.  
631 Curr Opin Cell Biol. 2017 Jun;46:33-38. doi: 10.1016/j.ceb.2016.12.004.  
632
- 633 [46] Barnum KJ, O'Connell MJ. Cell cycle regulation by checkpoints. Methods Mol Biol.  
634 2014;1170:29-40. doi: 10.1007/978-1-4939-0888-2\_2.  
635
- 636 [47] McMurchy AN, Stempor P, Gaarenstroom T, et al. A team of heterochromatin  
637 factors collaborates with small RNA pathways to combat repetitive elements and  
638 germline stress. Heard E, ed. eLife. 2017;6:e21666. doi:10.7554/eLife.21666.  
639
- 640 [48] Hamperl S, Cimprich KA. Conflict Resolution in the Genome: How Transcription and  
641 Replication Make It Work. Cell. 2016 Dec 1;167(6):1455-1467. doi:  
642 10.1016/j.cell.2016.09.053.  
643
- 644 [49] Larson AG, Elnatan D, Keenen MM, Trnka MJ, Johnston JB, Burlingame AL, Agard  
645 DA, Redding S, Narlikar GJ. Liquid droplet formation by HP1 $\alpha$  suggests a role for phase  
646 separation in heterochromatin. Nature. 2017 Jul 13;547(7662):236-240. doi:  
647 10.1038/nature22822.

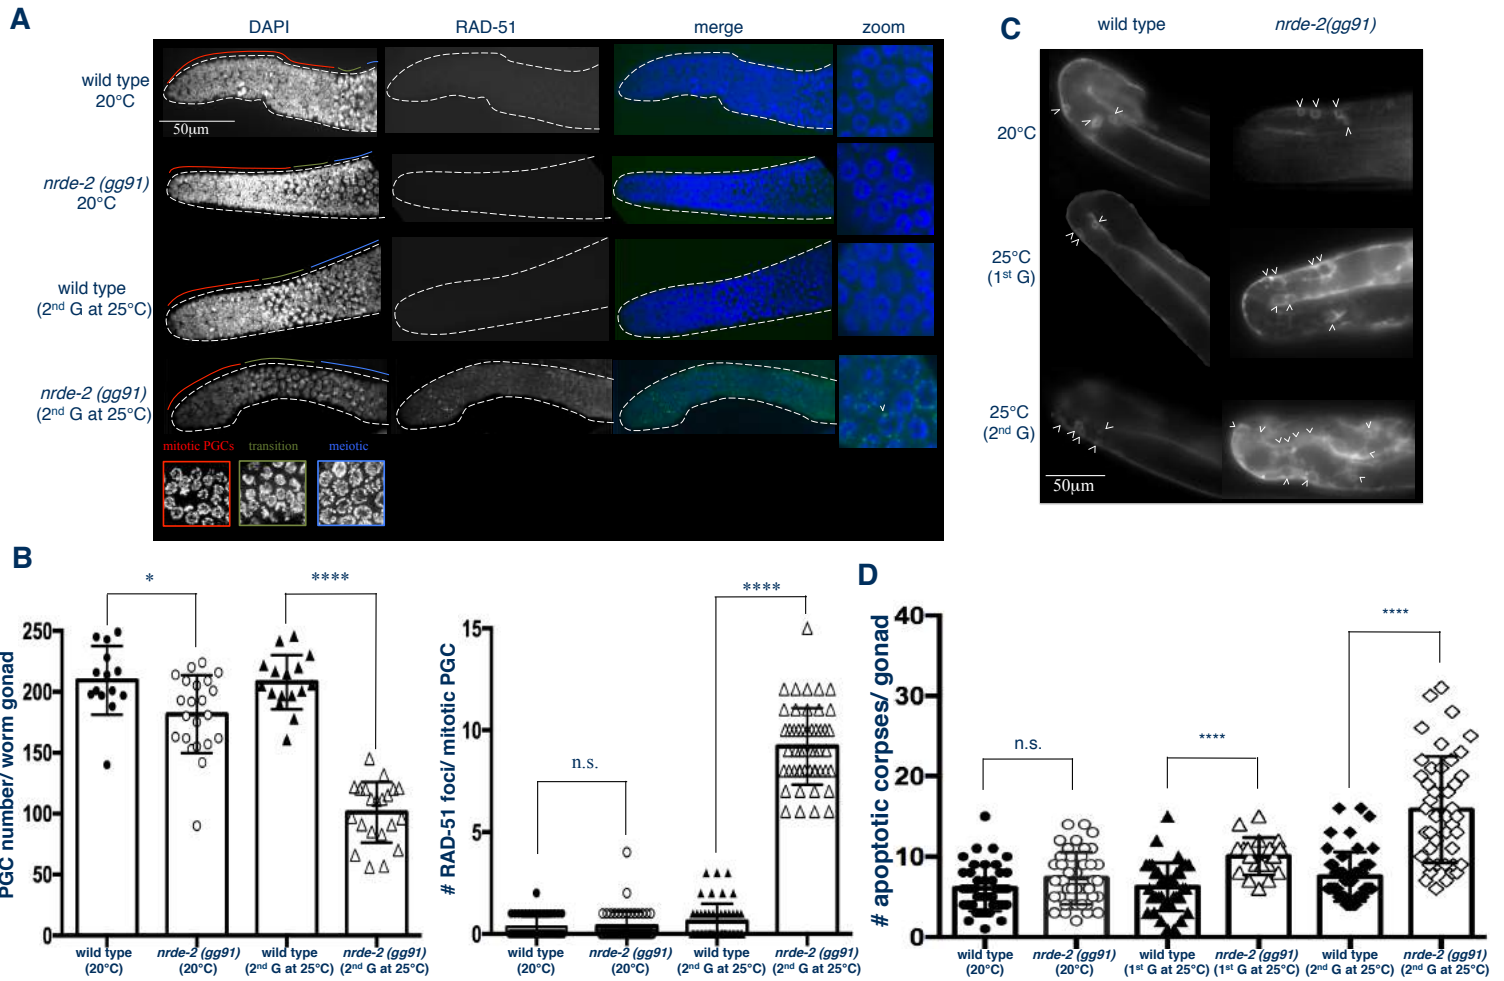

**Figure 1A: Loss of NRDE-2 significantly decreases the number of mitotic germ cells and increases the accumulation of RAD-51 foci in these cells in worms grown for two generations at 25°C.** Maximum intensity projections of DAPI stained gonads with RAD-51 foci visualized in the green channel using an antibody against RAD-51. (Left panels) The red line indicates mitotic proliferating germ cell zone, the green line indicates transition zone where DAPI labeled chromosomes exhibit a “crescent-like” morphology, and the blue line indicates meiotic zone. (Right panels) Zoomed in image of one focal plane of mitotic PGCs. The white arrow indicates a single RAD-51 puncta. **Figure 1B: (Left Panel) Loss of NRDE-2 at 20°C decreases the number of PGCs and this is exacerbated when the worms are grown for two generations at 25°C.** Mean number  $\pm$  SEM of PGCs in gonads of wild type propagated at 20°C ( $209.6 \pm 7.518$ ,  $n=14$ ) and *nrde-2(gg91)* mutants propagated at 20°C ( $181.6 \pm 6.830$ ,  $n=22$ ) are different (\* $p=0.0115$ ). PGCs of G2 wild type worms propagated at 25°C ( $207.9 \pm 5.542$ ,  $n=16$ ) and G2 *nrde-2(gg91)* mutants propagated at 25°C ( $101.0 \pm 5.418$ ,  $n=21$ ) is different (\*\*\*\* $p<0.0001$ ). **(Right panel) Loss of NRDE2 at 25°C increases the number of RAD-51 foci per PGC nucleus.** The focal plane with the greatest number of RAD-51 foci was chosen for each germ cell nucleus. The number of RAD-51 foci per nuclear focal plane cell were averaged across 50 mitotic PGCs (10 PGCs closest to the distal tip cell in 5 gonads per condition). Mean number  $\pm$  SEM of RAD-51 foci in gonads of wild type propagated at 20°C ( $0.3400 \pm 0.07346$ ,  $n=50$ ) and *nrde-2(gg91)* mutants propagated at 20°C ( $0.3800 \pm 0.1026$ ,  $n=50$ ) are not different. RAD-51 foci of G2 wild type worms propagated at 25°C ( $0.6000 \pm 0.1245$ ,  $n=50$ ) have more RAD-51 foci than G2 *nrde-2(gg91)* mutants propagated at 25°C ( $9.200 \pm 0.2665$ ,  $n=50$ , \*\*\*\* $p<0.0001$ ). All data represents 3 experimental days and the p-values were determined using unpaired Student’s t test. **Figure 1C: Loss of NRDE-2 increases the number of CED-1::GFP-labeled cell corpses in worms grown for 1 or 2 generations at 25°C.** CED-1::GFP expressed in *nrde-2(gg91)* and wild type *C. elegans* gonads (white arrows indicate apoptotic cell corpses). **Figure 1D: Loss of NRDE-2 increases the number of apoptotic corpses in the gonads of worms grown for 1 or 2 generations at 25°C.** Quantification of CED-1::GFP labeled germ cells. Wild type worms propagated at 20°C ( $6.071 \pm 0.4409$ ,  $n=42$ ) have the same number of corpses as *nrde-2(gg91)* mutants propagated at 20°C ( $7.302 \pm 0.4897$ ,  $n=43$ ). Wild type worms ( $6.263 \pm 0.4869$ ,  $n=38$ ) have fewer cell corpses than *nrde-2(gg91)* mutants when grown for 1 generation at 25°C ( $10.05 \pm 0.5379$ ,  $n=19$ , \*\*\*\* $p<0.0001$ ). Wild type worms ( $7.510 \pm 0.4278$ ,  $n=51$ ) have fewer cell corpses than *nrde-2 (gg91)* mutants when grown for 2 generations at 25°C ( $15.86 \pm 0.9987$ ,  $n=44$ , \*\*\*\* $p<0.0001$ ). Cell corpses identified as described in Figure 1D. Data represents 3 experimental days and the p-values were determined using unpaired Student’s t test.



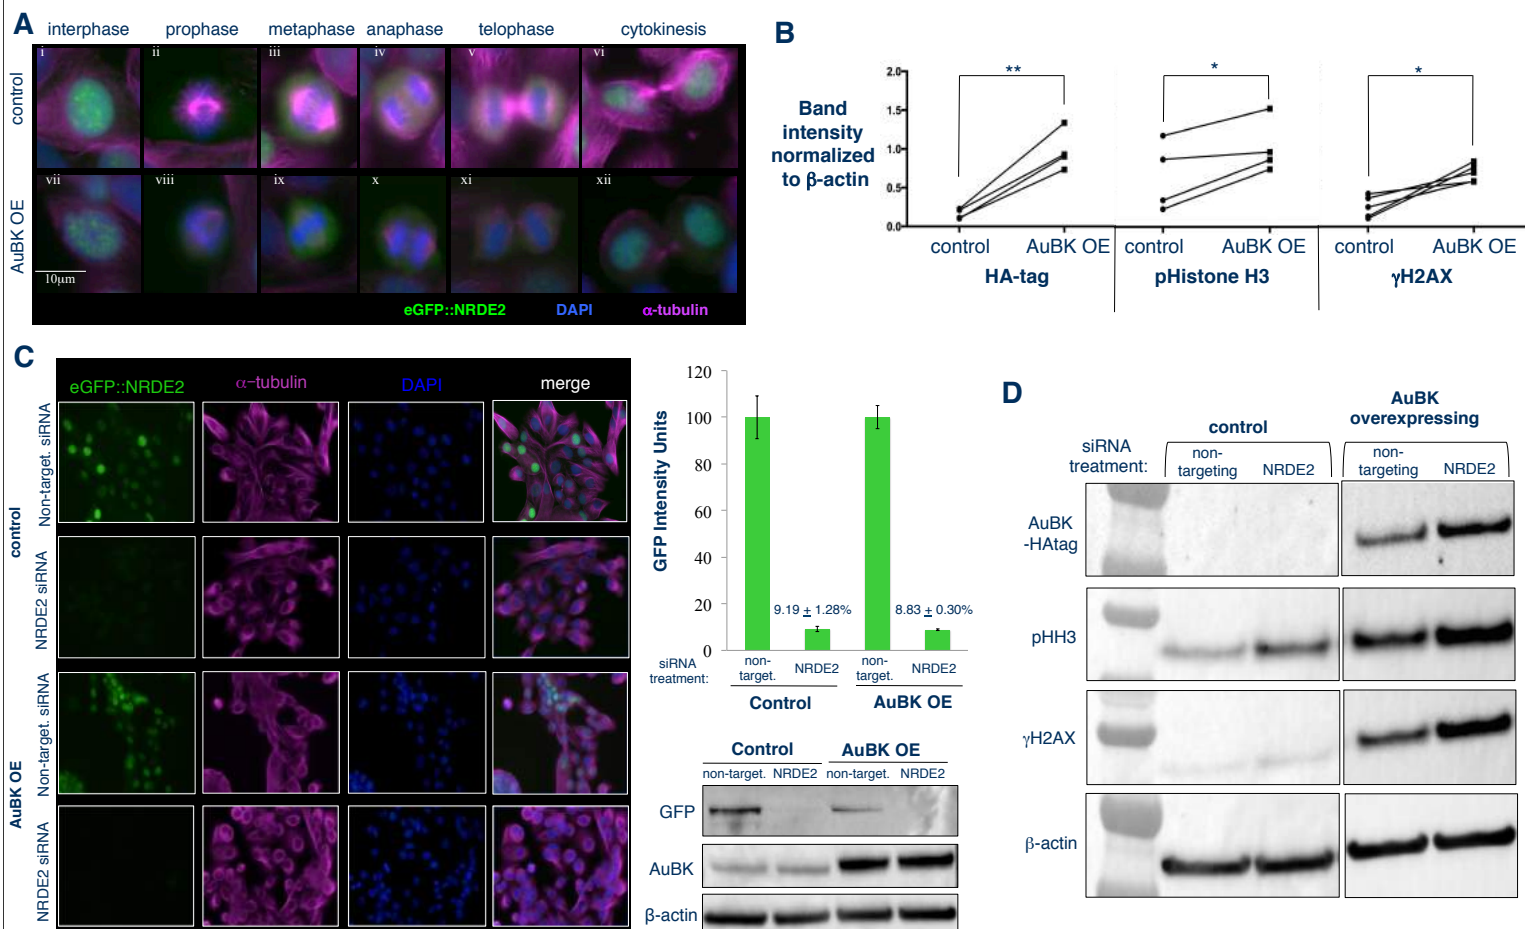

**Figure 2A:** In MCF10A human breast cells with endogenous or overexpressed AuBK levels, eGFP-NRDE2 localizes to puncta within the nucleus when chromatin is de-condensed during interphase and cytokinesis. In each circumstance, eGFP-NRDE2 is diffuse throughout all other stages of mitosis. Epifluorescent images of cells expressing eGFP-tagged NRDE2 as visualized in the green channel, chromatin as visualized by DAPI staining in the blue and the cytoskeleton as visualized by an antibody against  $\alpha$ -tubulin in the Cy5 (far red) channel. (Top row) MCF10A cells expressing control vector. (Bottom row) MCF10A cells over-expressing AuBK. **Figure 2B:** AuBK overexpression in MCF10A cells as a means to stress cells by increasing basal levels of DNA damage. Western blot band intensities (see figure 2D for representative blot) were measured and normalized to  $\beta$ -actin band intensity. HA-tag band intensity in HA-tagged AUBK overexpressing cells is higher than in control cells ( $n=4$ ;  $p=0.0046$ ). Phosphorylated Histone H3 band intensity in AUBK overexpressing cells is higher than in control cells ( $n=4$ ;  $p=0.0337$ ). Phosphorylated H2AX band intensity in AUBK overexpressing cells is higher than in control cells ( $n=5$ ;  $p=0.0146$ ). All p-values determined by paired Student's t test. **Figure 2C:** Average GFP intensity in MCF10A cells expressing eGFP-tagged NRDE2 decreases specifically in cells treated with NRDE2 targeted siRNA. (Left) Epifluorescent images of MCF10A cells expressing eGFP-tagged NRDE2 as visualized in the green channel, the cytoskeleton as visualized by an antibody against  $\alpha$ -tubulin in the far red channel and DNA as visualized by DAPI staining in the blue channel. Control or AuBK overexpressing MCF10A cells were treated with non-targeting siRNA or NRDE2 siRNA. (Top right) Quantification of epifluorescent GFP intensity of control and AuBK overexpressing cells treated with NRDE2 siRNA and normalized to the respective non-targeting siRNA treated cells. (Bottom right) Representative western blot using anti-GFP to detect eGFP-tagged NRDE2 in MCF10A cells treated with non-targeting or NRDE2 targeted siRNA. All cells treated with siRNA for 72 hours before imaging. Data represents 4 experimental days. **Figure 2D:** MCF10A cells that overexpress HA-tagged AuBK show an increase in phosphorylated Histone H3 and an increase in the DNA damage marker  $\gamma$ H2AX. Representative blot: Anti-HA-tag used to detect AuBK in cells transformed with AuBK-HAtag in MCF10A cells. AuBK overexpressing cells have increased levels of phosphorylated Histone H3 and increased levels of  $\gamma$ H2AX expression as compared to control cells. Western blot band intensities were measured and normalized to  $\beta$ -actin band intensity. See Fig S3 for quantification and statistics.

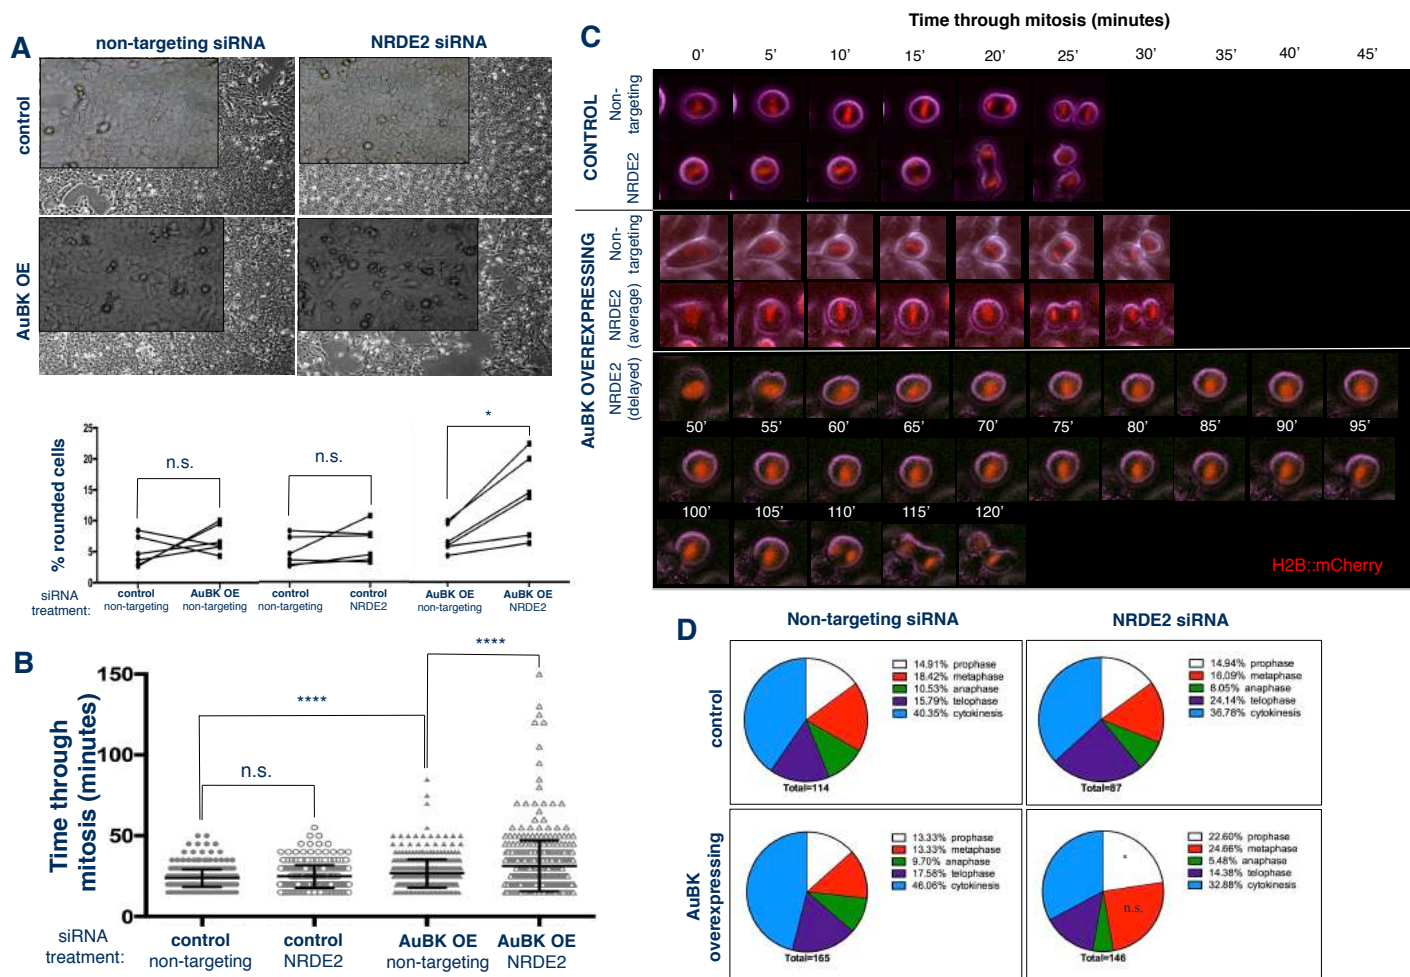

**Figure 3A: Loss of NRDE2 in MCF10A cells overexpressing AuBK results in an increase in the percentage of cells with a rounded morphology.** (Top) Brightfield images of cells 72 hours after siRNA treatment taken with 4x objective and 20x objective (inset). (Bottom) Quantitation of cell morphology. (Left paired points) Control or AuBK OE MCF10A cells show no difference in the percentage of round cells in cultures treated with non-targeting siRNA. (Middle paired points) MCF10A control cells show no difference in the percentage of round cells upon NRDE2 siRNA treatment as compared to non-targeting siRNA treatment. (Right paired points) MCF10A AuBK OE cells show a significant increase (\* $p=0.0110$ ) in the percentage of round cells upon NRDE2 siRNA treatment as compared to non-targeting siRNA treatment. Data represents 6 experimental days. All p-values determined by paired Student's t test. **Figure 3B: Loss of NRDE2 in MCF10A cells overexpressing AuBK delays time through mitosis.** Time required for individual MCF10A cells to through mitosis. Control cells treated with NRDE2 siRNA ( $24.87 \pm 0.3902$ ,  $n=318$ ) do not take significantly longer than control cells treated with non-targeting siRNA ( $23.79 \pm 0.2442$ ,  $n=492$ ) to progress through mitosis ( $p$ =not significant, Mann-Whitney test). AuBK over-expressing cells treated with NRDE2 siRNA ( $31.40 \pm 0.7220$ ,  $n=472$ ) take significantly longer than cell treated with non-targeting siRNA ( $26.72 \pm 0.4120$ ,  $n=451$ ) to progress through mitosis (\*\*\*\* $p<0.0001$ , Mann-Whitney test) **Figure 3C: Loss of NRDE2 delays time through mitosis in a subset of MCF10A cells overexpressing AuBK** of live MCF10A cells expressing H2B::mCherry visualized in the red channel to visualize chromatin compaction and chromosome separation. **Figure 3D: Loss of NRDE2 in AuBK overexpressing MCF10A cells significantly increases the proportion of cells in prophase.** Quantification of the percentage of cells in each phase of mitosis shows that AuBK overexpressing MCF10A cells have significantly more cells in prophase after treatment with NRDE2 siRNA as compared to treatment with non-targeting siRNA ( $p=0.0258$ , determined by student's t test). Data represents 4 experimental days.

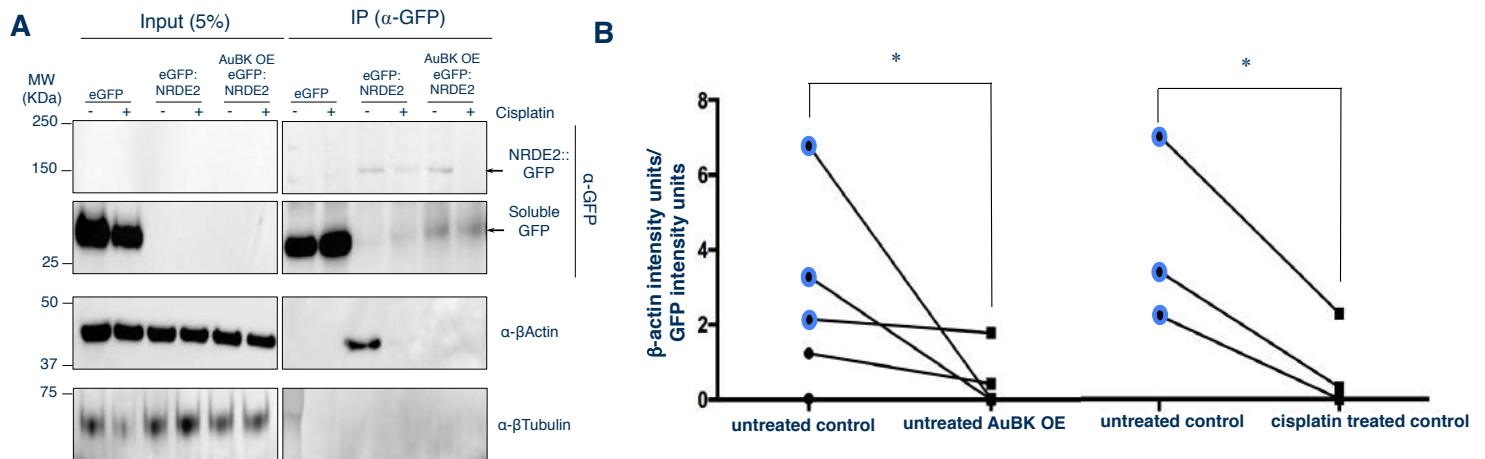

**Figure 4A: eGFP::NRDE2 interacts with  $\beta$ -actin in control cells. This interaction is weakened in AuBK OE cells and when cells are treated with cisplatin.** Representative western blots of MCF10A cell lysates. MCF10A cells were treated with 60uM cisplatin for 16 hours. Co-IP was performed using goat Anti-GFP antibody to pull down eGFP::NRDE2 from MCF10A cell lysates. Western blots were developed using rabbit anti-GFP polyclonal antibody to detect eGFP::NRDE2 and soluble GFP, anti- $\beta$ -actin HRP antibody and mouse anti- $\beta$ -tubulin antibody (negative control). **Figure 4B: The amount of  $\beta$ -actin per unit of IP'd eGFP::NRDE2 decreases when DNA damage is induced in cells by AuBK OE or by cisplatin drug treatment.** (Left) The amount of  $\beta$ -actin per unit of co-IP'd eGFP::NRDE2 decreases when MCF10A cells overexpress AuBK as compared to MCF10A control cells (\*Permutation test exact p-value =0.036). (Right) The amount of  $\beta$ -actin per unit of co-IP'd eGFP::NRDE2 decreases when MCF10A control cells are treated with 60uM cisplatin as compared to untreated control MCF10A cells. (\*p-value =0.045 as assessed by paired student's t test). Note: Blue data points represent quantification of the same samples.

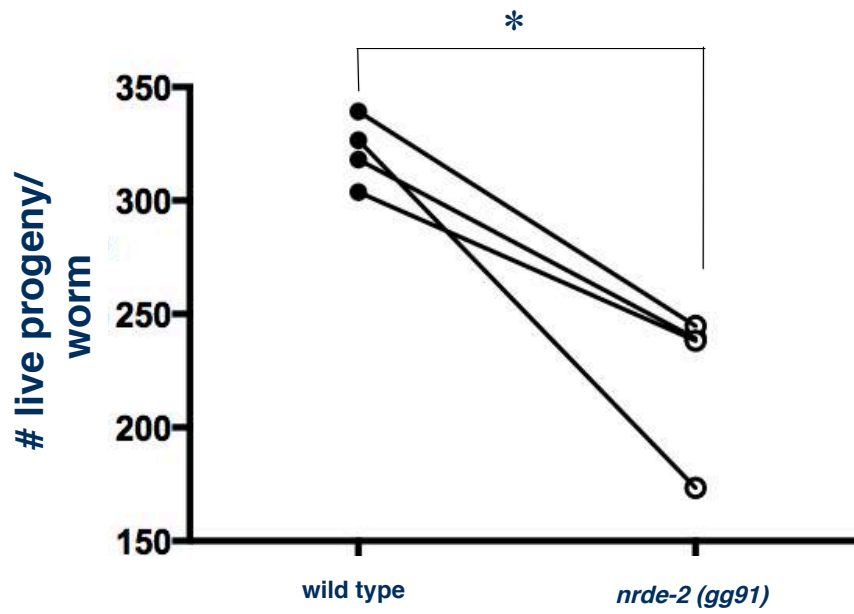

**Figure S1: Loss of NRDE-2 significantly decreases brood size as compared to wild type worms when propagated at 20°C.** Each data point represents one biological replicate of 16 worms per experiment (n=4; \*p=0.0148, paired Student's t test).

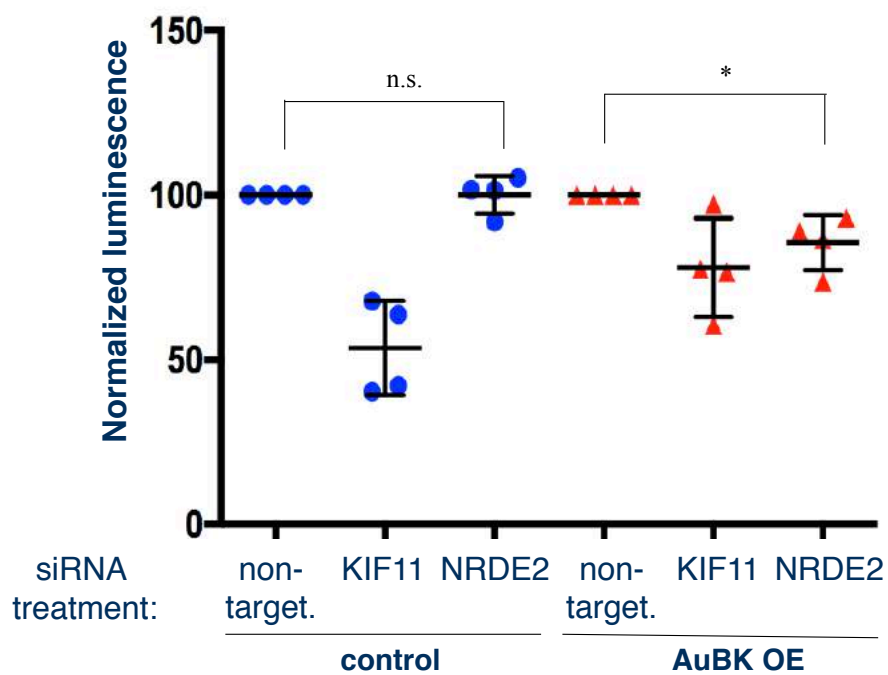

**Figure S2: NRDE2 knockdown decreases cell viability in AuBK OE cells but not in control cells.** The Cell Titer Glo assay measures the number of metabolically active cells by quantifying the amount of ATP present in the cell culture. The luminescent signal was normalized to non-targeting siRNA treated cells in both control cells and AuBK OE cells. KIF11 siRNA was used as a positive control. Control cells treated with NRDE2 siRNA ( $100.0 \pm 2.890$ ,  $n=4$ ) had no change in luminescence as compared to control cells treated with non-targeting siRNA. AuBK OE cells treated with NRDE2 siRNA ( $85.55 \pm 4.167$ ,  $n=4$ ) had a lower amount of luminescence as compared to AuBK OE cells treated with non-targeting siRNA ( $*p=0.0133$ ). P-values determined using unpaired Student's t test.

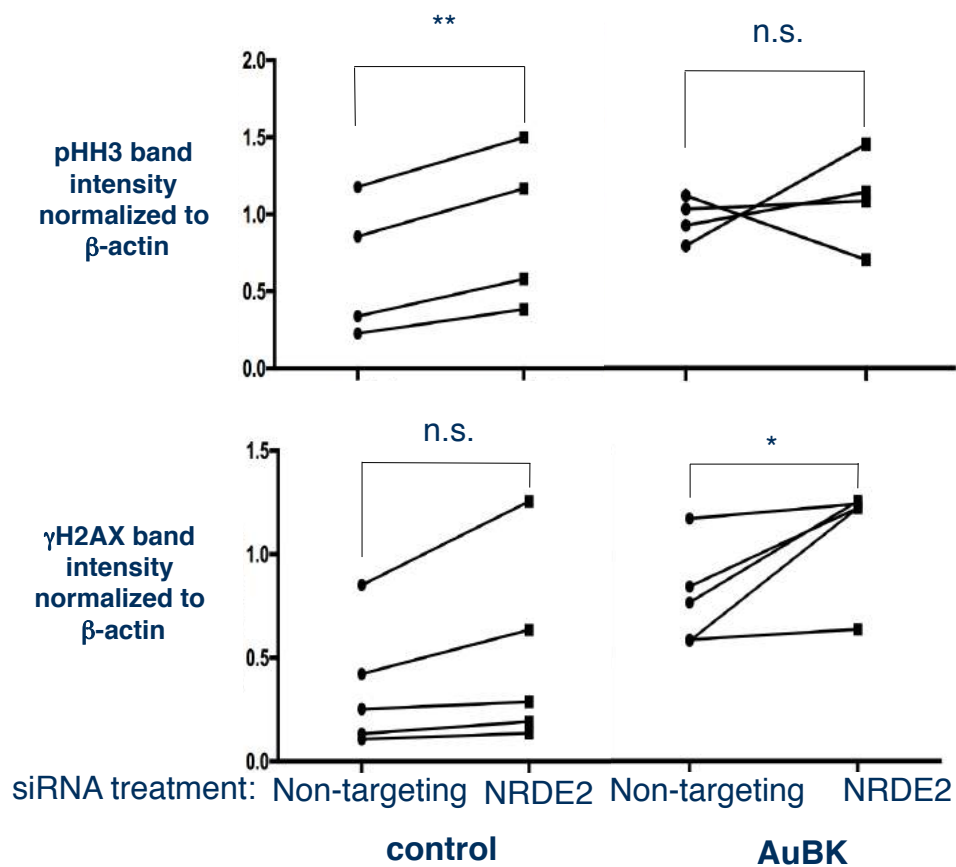

**Figure S3** (Top) Loss of NRDE2 in control cells increases pHH3 levels as compared to control cells treated with non-targeting siRNA (n=4, p=0.0068). In contrast, loss of NRDE2 in AuBK OE cells does not change pHH3 levels (p=??). (Bottom) Loss of NRDE2 in control cells does not alter levels of γH2AX (p=??), however in AuBK OE cells, loss of NRDE2 increases γH2AX levels. (n=5, \*p=0.0483) All p-values determined using paired student's t test.

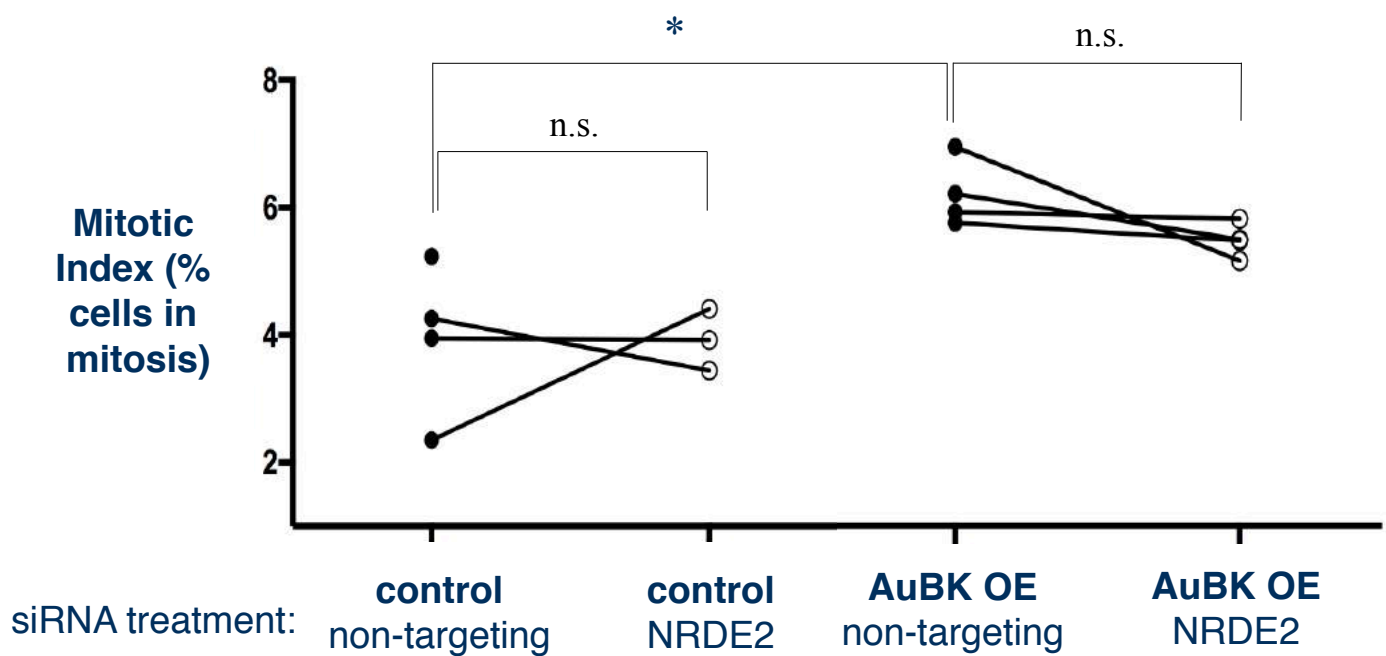

**Figure S4: Loss of NRDE2 in MCF10A cells does not significantly change the mitotic index.** Mitotic Index calculated by dividing total number of cells in mitosis by total number of cells in the population. AuBK overexpressing cells have a significantly higher basal mitotic index than control cells (\* $p=0.0315$ , student's paired t test).



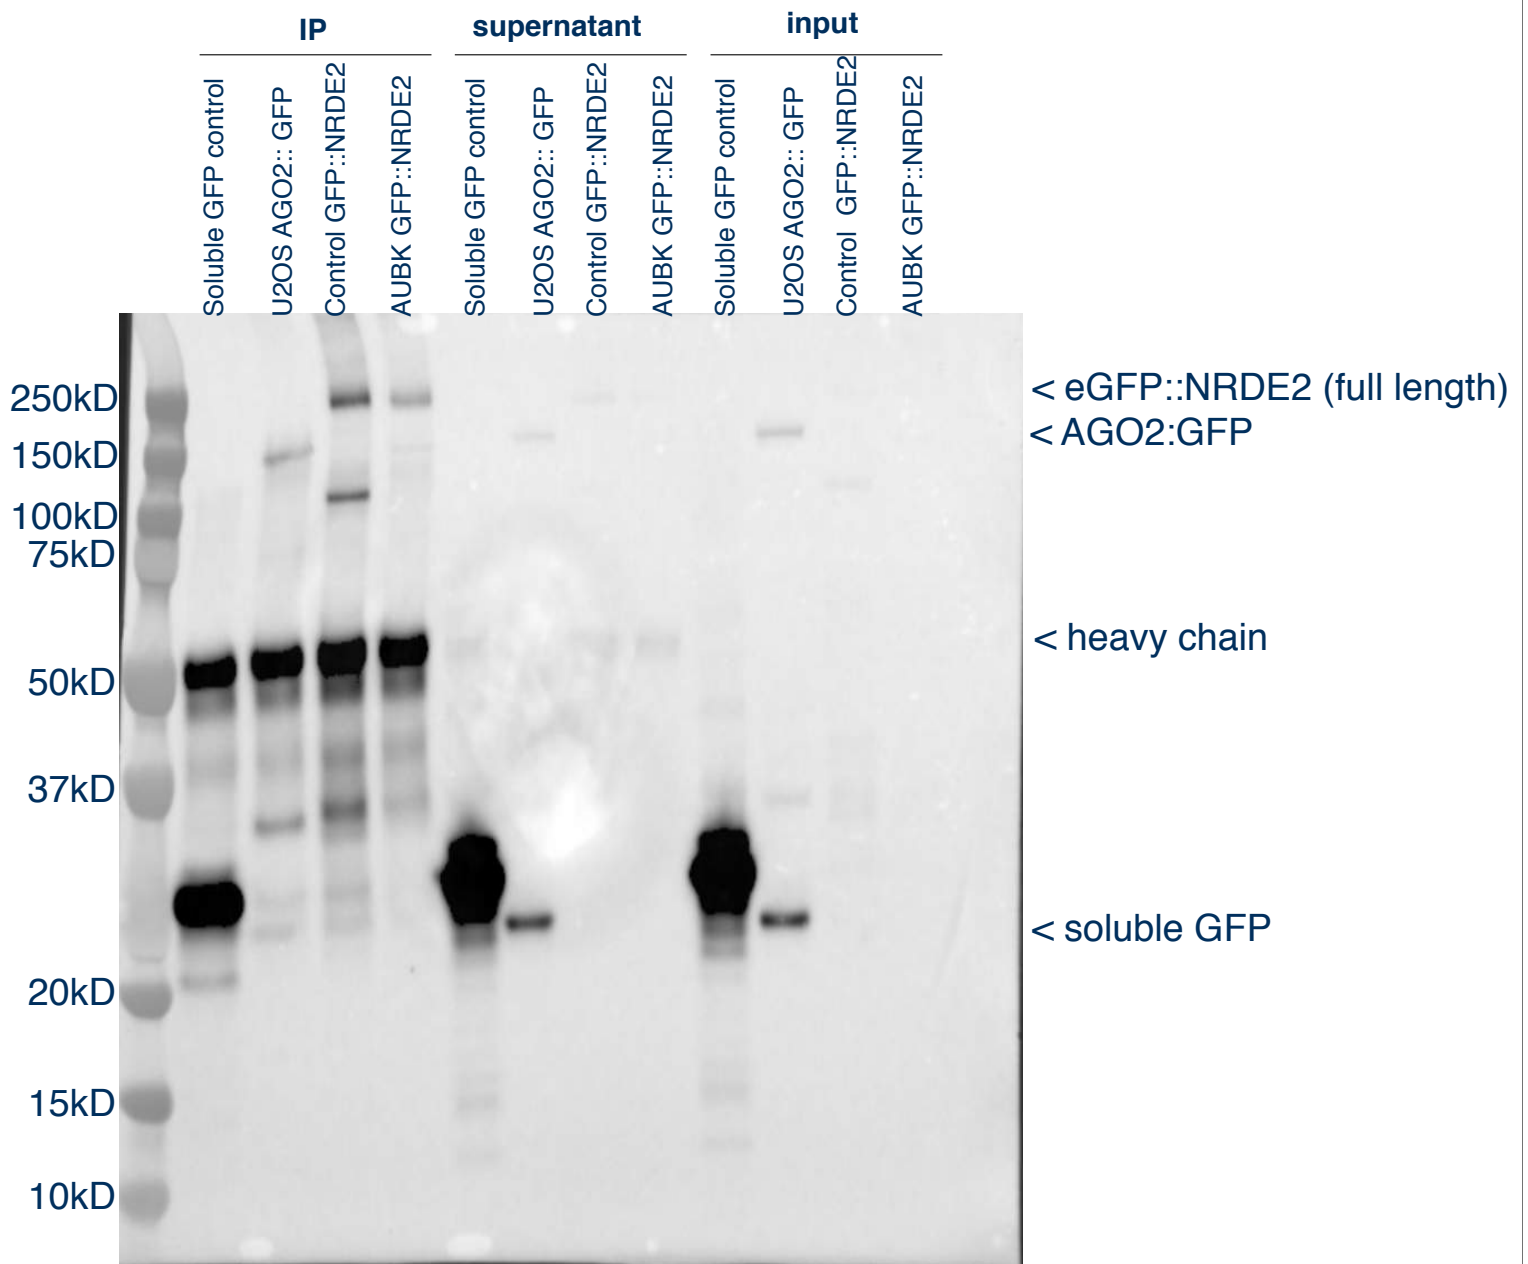

**Figure S5: Representative western blot of MCF10A cell lysates.** Co-IP was performed using goat Anti-GFP antibody to pull down eGFP::NRDE2 from MCF10A cell lysates. Western blots were developed using rabbit anti-GFP polyclonal antibody to detect eGFP::NRDE2 and soluble GFP.



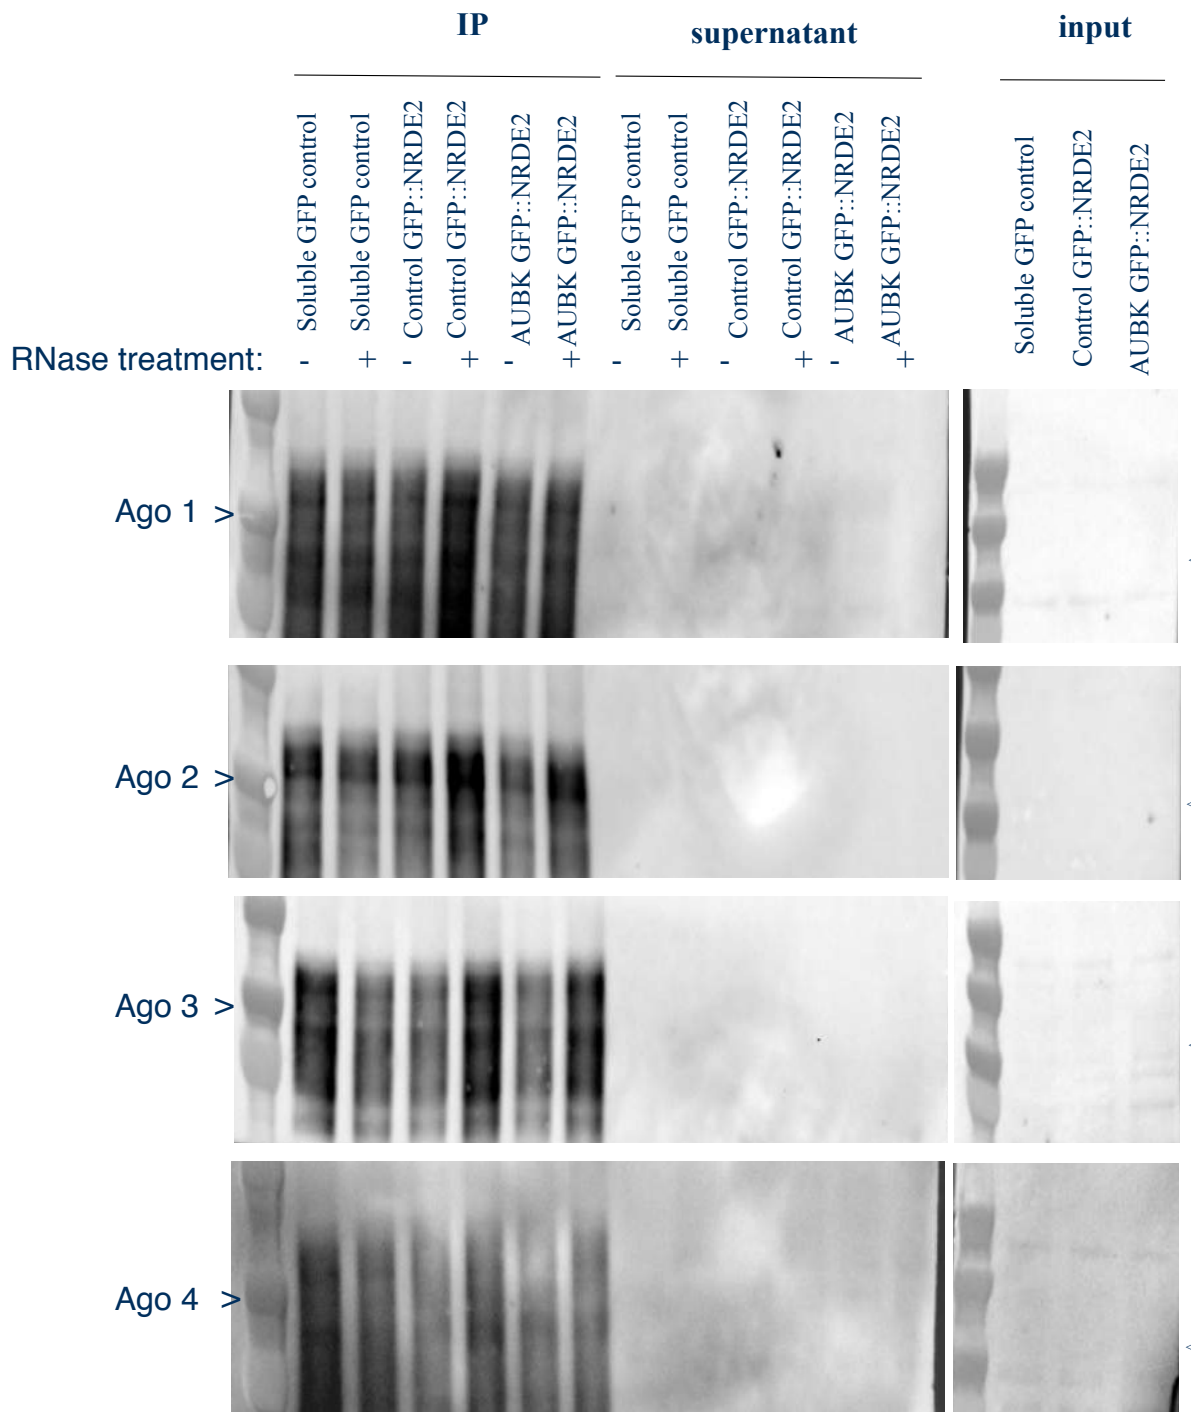

**Figure S6: NRDE-2 does not interact with the mammalian argonautes Ago 1,2,3 or 4.** Goat anti-GFP used to pull down eGFP::NRDE2 in MCF10A lysates in co-IP assay. Western blots against human Ago1-4 show no interaction with eGFP::NRDE2. Arrows point to 97kD, the expected size of each Ago protein.

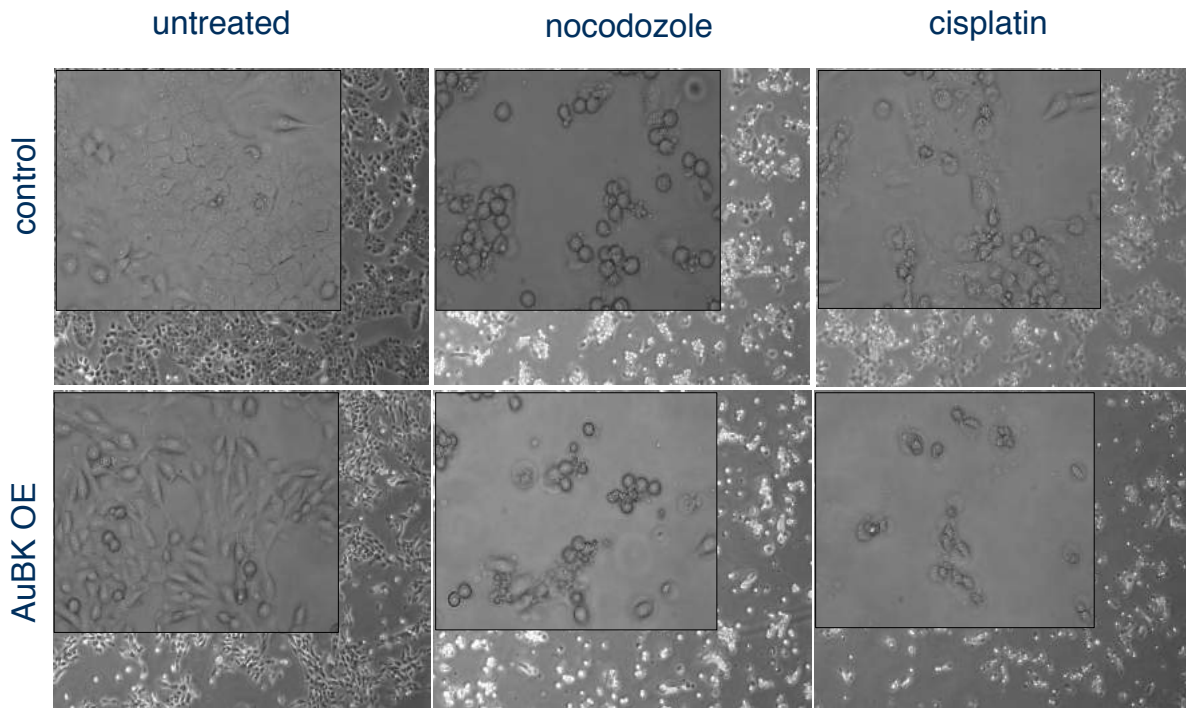

**Figure S7: Control and AuBK OE MCF10A cells treated with nocodazole show rounded morphology consistent with stall in G2/M. Cells treated with cisplatin show rounded, fragmented morphology, consistent with apoptosis.** Representative brightfield images of cells taken 16 hours after 0.1ug/ml nocodazole or 60uM cisplatin drug treatment with 4x objective and 20x objective (inset).
